## **Covid-19 health care demand and mortality in Sweden in response to non-pharmaceutical (NPIs) mitigation and suppression scenarios**

Henrik Sjödin<sup>1</sup>, Anders F. Johansson<sup>2</sup>, Zia Farooq<sup>1</sup>, Åke Brännström<sup>3</sup>, Hedi Katre Kriit<sup>1</sup>, Annelies Wilder-Smith<sup>4-6</sup>, Christofer Åström<sup>1</sup>, Johan Thunberg<sup>2</sup>, Joacim Rocklöv<sup>1</sup>

1. Department of Public Health and Clinical Medicine, Section of Sustainable Health, Umeå University, Umeå, Sweden
2. Department of Clinical Microbiology, Umeå University, Umeå, Sweden
3. Department of Mathematics and Mathematical Statistics, Umeå University, Umeå, Sweden
4. Department of Epidemiology and Global Health, Umeå University, Umeå, Sweden
5. Department of Disease Control, London School of Hygiene and Tropical Medicine, London, UK
6. Heidelberg Institute of Global Health, University of Heidelberg, Heidelberg, Germany

Corresponding author: Joacim Rocklöv, Department of Public Health and Clinical Medicine, Umeå University, Umeå, Sweden. Email: [joacim.rocklov@umu.se](mailto:joacim.rocklov@umu.se)

### **Introduction**

In response to the COVID-19 outbreak, China implemented extraordinary public health measures at great socio-economic cost, moving swiftly and decisively to ensure early identification of cases, prompt laboratory testing, facility-based isolation of all cases, contact tracing and quarantine.<sup>1</sup> In the community, social distancing was implemented at a grand scale, all mobility put to an halt, and the city of Wuhan was in lock-down for about 4 weeks. China's tremendous efforts showed success. Other Asian countries facing a major explosion such as South Korea also managed to curb the epidemic. South Korea employed very liberal testing, hospital-based isolation of all cases (even mild ones), combined with extensive contact tracing enhanced by mobile phone and digital technologies, but did not use a lock-down.<sup>2,3</sup> Despite many importations early on in the outbreak, Singapore has seen a flat rate of daily new cases, by focusing on prompt and aggressive pro-active case detection and attempting to interrupt every chain of transmission and keeping clusters at bay.<sup>4</sup>

While the outbreak in China is now contained, since mid March 2020, the epicentre of the COVID-19 pandemic is in Europe<sup>5</sup>, with Italy reporting more deaths than China. Various European countries have seen an exponential growth in daily new cases, and unless strong

reductions in transmission, the wave is expected to hit all of Europe by the end of March 2020. There is an urgent need to reduce transmission and thus reduce the growth rate of this epidemic, reduce the height of the epidemic peak and the peak demand on healthcare services, as well as reduce the total number of infected persons.

In the absence of vaccines, a wide range of control measures can be considered to contain or mitigate COVID-19. These include active case finding with prompt isolation of cases, contact tracing with quarantine of contacts, school closures and closures of public places, mobility restrictions, social distancing in the community, social distancing only of the elderly, and a lock-down (also known as cordon sanitaire).<sup>1</sup> There is currently no consensus about which measures should be considered, in which combination, and at which epidemiological threshold such measures should be implemented for maximum public health impact.<sup>6</sup>

European policy-makers are currently debating two strategies: (a) containment or suppression, which aims to reverse epidemic growth, thereby reducing case numbers to low levels. And (b) mitigation, which focuses on slowing but not necessarily stopping epidemic spread –reducing peak healthcare demand while protecting those most at risk of severe disease from infection. Each policy has major challenges. Containment aims to reduce the reproduction number,  $R$ , to below 1, thus causing case numbers to decline. Mitigation aims to merely slow spread by reducing  $R$ , but not to below 1.

It should now be an urgent priority to quantify the effects of these measures and specifically whether they can reduce the effective reproductive number below 1, because this will guide the response strategies.

Here we estimate the impact of COVID-19 on the Swedish population at the municipality level, considering demography and human mobility under scenarios of mitigation and suppression. We estimate the timelines of incidence, hospitalization rates, the intensive care (ICU) need, and the mortality in relation to the current Swedish ICU capacity, and costs of care. We further investigate the sensitivity to various degrees of potential underreporting on the estimates.

## Methods

We fitted a compartmental SEIR alike model including compartment for hospitalization and ICU care with age groups of 0-59, 60-79, and 80+ years at the level of municipality in Sweden. We further linked the municipalities to each other using a radiation model which was calibrated using a N1H1 Influenza A model to the influenza incidence in Sweden from 2015-2018. Demographic data was taken at the municipality level of Sweden for year 2018 from Statistics Sweden and all estimates were derived by municipality weighted proportion of populations by age groups of 10 years.

The case fatality ratio (CFR) varies across regions, partly depending on age structure of population, but also potential underreporting. Hospitalization and ICU needs per apparent infections were taken from Ferguson et al.<sup>7</sup> We like Ferguson et al. assumed the infection fatality ratio (IFR) was lower than the CFR adjusting for underreporting, depending on the municipality age structure. We run the base scenario models on the assumption of 50% underreporting, approximately similar to Ferguson et al.<sup>7</sup> Under this assumption the IFR was estimated to around 1.0% (high) depending on the exact age structure. We further investigated the sensitivity to these results by allowing the proportion of underreporting due to mild disease to vary up to 80% and 90%, and thus the IFR to fall to around 0.5% (medium) and 0.2% (low) depending on age structure. The lower IFR of 0.2% still is double the IFR associated with influenza A.

We modelled the impact of the SARS-COV-2 virus on the Swedish population using the various counter measures associated with the mitigation versus the suppression strategies. The baseline scenarios include isolation of hospitalized patients and self-quarantine, which is restricting the infectious period of the average population. The infectious period in severely ill hospitalized patients is likely to vary by individual and range from days to weeks. In most cases, viral shedding in respiratory secretion for about seven days is likely a major driver of disease transmission. Due to the self-quarantine advice if symptoms (cough, fever), the actual infectious period can be assumed much shorter for many people, but household members are often still at risk. There are also clear indications for asymptomatic and pre-symptomatic transmission. We thus assumed the average effective infectious period was centered around 5 days, with a  $\beta$  of 0.5, this associates to an  $R_0$  of 2.5, which is in the middle

of the range of reported basic reproduction rates for COVID-19. In the mitigation versus suppression scenarios we assumed the quarantine and isolation based on symptoms was present from the first day of reported COVID-19 cases in Sweden, February 24, 2020, while the mitigation and suppression strategies was activated first the 20<sup>th</sup> of March, 2020. The model and parameters are described in the supplement.

The model was initiated to simulate the municipality transmission dynamics and inter-municipality spread across Sweden starting from the 24<sup>th</sup> of February and ending 6 months later, August 23, 2020. Due to the many arriving travelers carrying SARS-COV-2 arriving from Italy the week of the 24<sup>th</sup> of February, the model was seeded with 1 case per 50,000 population. Municipalities smaller than 50,000 did not have any index cases. These index cases can either be seen as asymptomatic cases, cases with symptoms but lack of compliance to home quarantine, or cases with late symptom onset not identified early enough.

| <b>Table 1.</b> Scenarios of different countermeasures to COVID-19. Isolation and self-quarantine onset were 24 <sup>th</sup> of February; onset of the social isolation of elderly 13 <sup>th</sup> of March; onset of between municipality mobility 13 <sup>th</sup> of March; onset of all other interventions 20 <sup>th</sup> of March. |                                                                                                                                |                                 |                                 |
|----------------------------------------------------------------------------------------------------------------------------------------------------------------------------------------------------------------------------------------------------------------------------------------------------------------------------------------------|--------------------------------------------------------------------------------------------------------------------------------|---------------------------------|---------------------------------|
| Scenario                                                                                                                                                                                                                                                                                                                                     | Description                                                                                                                    | Mobility between municipalities | Contact rates/social distancing |
| 1                                                                                                                                                                                                                                                                                                                                            | Isolation of hospitalized cases and self-quarantine of apparent symptomatic infections                                         | Normal 100%                     | Normal 100%                     |
| 2                                                                                                                                                                                                                                                                                                                                            | Isolation of hospitalized cases and self-quarantine of apparent symptomatic infections and reduction; medium social distancing | Normal 100%                     | Medium 75%                      |

|   |                                                                                                                                                                                                          |             |                                     |
|---|----------------------------------------------------------------------------------------------------------------------------------------------------------------------------------------------------------|-------------|-------------------------------------|
| 3 | Isolation of hospitalized cases and self-quarantine of apparent symptomatic infections; strong social distancing                                                                                         | Normal 100% | Strong 50%                          |
| 4 | Isolation of hospitalized cases and self-quarantine of apparent symptomatic infections; very strong social distancing (starting 20 <sup>th</sup> March)                                                  | Normal 100% | Very strong 25%                     |
| 5 | Isolation of hospitalized cases and self-quarantine of apparent symptomatic infections; low mobility between municipalities (starting 20 <sup>th</sup> of March)                                         | Low 50%     | Normal 100%                         |
| 6 | Isolation of hospitalized cases and self-quarantine of apparent symptomatic infections and reduction; medium social distancing; low mobility between municipalities (starting 20 <sup>th</sup> of March) | Low 50%     | Medium 75%                          |
| 7 | Isolation of hospitalized cases and self-quarantine of apparent symptomatic infections; strong social distancing; low mobility between municipalities (starting 20 <sup>th</sup> of March)               | Low 50%     | Strong 50%                          |
| 8 | Isolation of hospitalized cases and self-quarantine of apparent symptomatic infections; very strong social distancing; low mobility between municipalities (starting 20 <sup>th</sup> of March)          | Low 50%     | Very strong 25%                     |
| 9 | Isolation of hospitalized cases and self-quarantine of apparent symptomatic infections; social distancing of elderly                                                                                     | Low 50%     | Very strong 50% among ages 60 years |

## Results

The epidemic in Sweden as a whole show to be sensitive to some of the NPI's. Overall, the peak months varies by location, where overall the smaller rural municipalities are predicted to experience a later peak, and the urban municipalities are predicted to peak earlier.

Reduced mobility between municipalities (scenario 1 vs 2) do change the timing of the peak, and further delays the outbreak onset in smaller rural municipalities. Municipalities with the oldest population overall experience higher ICU needs and largest health impacts.

Considering the ICU needs in the age groups studied, the scenarios 1-3 and 5-7 and 9 where contact rates and social distancing are reduced to by 50% independent of between municipality mobility, are resulting in mitigation scenarios. Some of them are flattening the outbreak curve and the ICU need substantially, especially at the 50% reduction of contacts and social distancing. The role of between municipality is still important, but not significantly for the rates demand in the whole of Sweden. For suppression, the contact rates and social distancing need to be reduced by 75%, also here the between municipality mobility is not a key factor when looking at the demand for the whole of Sweden overall. Scenario 9 corresponding to the mitigation scenario by only protecting the ages 60+ by reducing their contact by 50% by increasing social distancing isn't very sensitive to the between municipality mobility when looking at the ICU demand. The results of these predictions aggregated for all the municipalities in Sweden is presented in Figure 1.

The ICU need for the total population of Sweden ranges from around 6 times to 30 times the ICU capacity of Sweden at the peak of the outbreak in the scenario 1 where only isolation and self-quarantine is practiced (Figure 1) depending on the IFR. In this scenario the age group below 60 year take up a substantial ICU need. In scenario 2 where contact rates are reduced moderately the whole population by social distancing, the demand at the peak of the outbreak is around 20 to 4 times higher than the ICU capacity, and the curve is slightly flattened. At the higher IFR the ages under 60 takes up a significant proportion of ICU capacity. Scenario 3 with strong reduction in contact rates and increases in social distancing the ICU demand curve is substantially flattened. At this level the ICU demand is lower than the capacity at the low IFR, just above at the medium IFR, and substantially above at the

high IFR. In scenario 4 where the contact rates and social distancing is very strong, the outbreak is suppressed, but risk to pick up again when the social distancing stops.

Overall the scenarios 5-8 show similar patterns to 1-4 respectively but indicate the outbreaks and ICU demand is a bit larger for a longer period overall in Sweden when the between municipality mobility is higher compared to lower. In Figure 2 scenarios 9 is illustrated with 50% reduction in contacts and increased social distancing among ages 60+. In this scenario the under 60 years with take of a large bit of the ICU capacity independent of the IFR. At the peak the ICU demand will be around 30 times the capacity in Sweden at the higher IFR, while around 5 times the capacity at the lower IFR.

| Scenario | IFR    | Peak characteristics |        |                 |       |              |       |                         |                                   |
|----------|--------|----------------------|--------|-----------------|-------|--------------|-------|-------------------------|-----------------------------------|
|          |        | Infections           |        | In patient care |       | ICU demand   |       | Deaths                  |                                   |
|          |        | Month                | No.    | Month           | No.   | Month        | No.   | No limits in ICU access | Excess due to limited ICU access* |
| 1        | High   | 17-maj-2020          | 819323 | 22-maj-2020     | 42752 | 28-maj-2020  | 14624 | 41930                   | 41404                             |
| 1        | Medium | 17-maj-2020          | 817490 | 22-maj-2020     | 17065 | 28-maj-2020  | 5837  | 16748                   | 16222                             |
| 1        | Low    | 17-maj-2020          | 816938 | 22-maj-2020     | 8525  | 28-maj-2020  | 2916  | 8370                    | 7844                              |
| 2        | High   | 4-juni-2020          | 432341 | 10-juni-2020    | 23555 | 15-juni-2020 | 8298  | 33380                   | 32854                             |
| 2        | Medium | 5-juni-2020          | 431035 | 9-juni-2020     | 9392  | 16-juni-2020 | 3309  | 13320                   | 12794                             |

|   |        |                |         |                |       |              |       |       |       |
|---|--------|----------------|---------|----------------|-------|--------------|-------|-------|-------|
| 2 | Low    | 5-juni-2020    | 430576  | 9-juni-2020    | 4692  | 15-juni-2020 | 1653  | 6655  | 6129  |
| 3 | High   | 20-juli-2020   | 81283   | 24-juli-2020   | 4719  | 31-juli-2020 | 1723  | 7988  | 7462  |
| 3 | Medium | 19-juli-2020   | 80966   | 24-juli-2020   | 1880  | 30-juli-2020 | 686   | 3186  | 2660  |
| 3 | Low    | 20-juli-2020   | 80863   | 25-juli-2020   | 939   | 30-juli-2020 | 343   | 1592  | 1066  |
| 4 | High   | 23-mars - 2020 | 5318    | 30-mars - 2020 | 256   | 8-apr-2020   | 85    | 211   | 0     |
| 4 | Medium | 23-mars - 2020 | 5307    | 30-mars - 2020 | 102   | 7-apr-2020   | 34    | 84    | 0     |
| 4 | Low    | 23-mars - 2020 | 5315    | 30-mars - 2020 | 51    | 8-apr-2020   | 17    | 42    | 0     |
| 5 | High   | 17-maj-2020    | 1079634 | 21-maj-2020    | 54144 | 27-maj-2020  | 18045 | 42960 | 42434 |
| 5 | Medium | 17-maj-2020    | 1076896 | 21-maj-2020    | 21610 | 27-maj-2020  | 7200  | 17161 | 16635 |
| 5 | Low    | 17-maj-2020    | 1075473 | 21-maj-2020    | 10793 | 26-maj-2020  | 3596  | 8577  | 8051  |
| 6 | High   | 7-juni-2020    | 605920  | 13-juni-2020   | 31683 | 18-juni-2020 | 10922 | 37215 | 36689 |
| 6 | Medium | 8-juni-2020    | 603866  | 12-juni-2020   | 12635 | 17-juni-2020 | 4355  | 14852 | 14326 |



|   |        |                |        |                |       |              |       |       |       |
|---|--------|----------------|--------|----------------|-------|--------------|-------|-------|-------|
| 6 | Low    | 8-juni-2020    | 603293 | 13-juni-2020   | 6309  | 18-juni-2020 | 2175  | 7420  | 6894  |
| 7 | High   | 11-aug-2020    | 115777 | 13-aug-2020    | 6463  | 16-aug-2020  | 2322  | 9688  | 9162  |
| 7 | Medium | 10-aug-2020    | 115362 | 12-aug-2020    | 2575  | 17-aug-2020  | 925   | 3866  | 3340  |
| 7 | Low    | 10-aug-2020    | 115212 | 12-aug-2020    | 1286  | 17-aug-2020  | 462   | 1931  | 1405  |
| 8 | High   | 23-mars - 2020 | 5319   | 30-mars - 2020 | 256   | 6-apr-2020   | 85    | 209   | 0     |
| 8 | Medium | 23-mars - 2020 | 5310   | 31-mars - 2020 | 102   | 8-apr-2020   | 34    | 84    | 0     |
| 9 | High   | 26-maj-2020    | 862333 | 2-juni-2020    | 38576 | 9-juni-2020  | 11935 | 32820 | 32294 |
| 9 | Medium | 25-maj-2020    | 860146 | 1-juni-2020    | 15385 | 8-juni-2020  | 4759  | 13097 | 12571 |
| 9 | Low    | 26-maj-2020    | 859607 | 2-juni-2020    | 7686  | 9-juni-2020  | 2377  | 6544  | 6018  |

- Limited to the current ICU threshold of 526

## Discussion

The results show a strong demand on health care and potential risks of fatalities in relation to sensitivity of the Swedish impacts from COVID-19. They describe uncertainty in the impacts from the responses in relation to mobility, connectivity, social distancing. The results strongly indicate risks with large demands of in-patient care and intensive care in relation to scenarios with less strong reductions in contact rates and with less social

distancing. Those impacts are reduced when we assume the underreporting is more substantial.

Overall, these analyses include uncertainties and with the development of more knowledge of the virus SARS-CoV-2 and the disease risks with COVID-19, the implications of the results may need to be revisited.

Sweden is currently (20<sup>th</sup> of March, 2020) most likely following the scenario 2 and scenario 9 development, which suggest the health care demand and mortalities could be substantially from COVID-19. A change in strategy could reduce the impacts on the health care demand and the public health substantially, but would also need to consider impacts on other sectors in the society.

## References

- 1 Wilder-Smith, DO Freedman. Isolation, quarantine, social distancing and community containment: Pivotal role for old-style public health measures in the novel coronavirus (2019-ncov) outbreak. *J Travel Med* 2020.
- 2 Korean Society of Infectious, D Korean Society of Pediatric Infectious, E Korean Society of, et al. Report on the epidemiological features of coronavirus disease 2019 (covid-19) outbreak in the republic of korea from january 19 to march 2, 2020. *J Korean Med Sci* 2020; 35(10):e112.
- 3 Covid-19 National Emergency Response Center, KCfDC Case Management Team, Prevention. Contact transmission of covid-19 in south korea: Novel investigation techniques for tracing contacts. *Osong Public Health Res Perspect* 2020; 11(1):60-63.
- 4 VJ Lee, CJ Chiew, WX Khong. Interrupting transmission of covid-19: Lessons from containment efforts in singapore. *J Travel Med* 2020.
- 5 Livingston, K Bucher. Coronavirus disease 2019 (covid-19) in italy. *JAMA* 2020.
- 6 Flahault. Covid-19 cacophony: Is there any orchestra conductor? *Lancet* 2020; online(
- 7 Ferguson, et al. Impact of non-pharmaceutical interventions (npis) to reduce covid-19 mortality and healthcare demand. DOI: <https://doi.org/10.25561/77482> 2020.

## Supplement

To account for time delays in the spatial spread of SARS-CoV-2 over large geographical ranges (i.e., Sweden) we set up a spatial compartmental model. We accordingly make a distinction between local (municipality) and global (Sweden) processes. The effects of local contact structures were assumed to be well described by the law of mass action; at local scales we can assume a well-mixed contact-structure due to the transmission efficiency at such spatial scales of SARS-CoV-2. The effects of global contact structures were assumed to

be well described by the Radiation model<sup>1</sup>, which introduces time delays to the spatial progression of infections over Sweden.

We can therefore express a compartmental model generally for any municipality. We have developed an age-structured SEIR-based compartmental model extended to account for health-care demand arising from COVID-19 epidemic in Sweden. In any municipality  $i$ , we account for all individuals that are susceptible  $S_i$ ; latent (exposed)  $E_i$ ; infectious  $I_i$ ; in health care  $H_i$ ; in critical care  $C_i$ ; recovering in health care after critical care  $\tilde{H}_i$ ; dead due to SARS-CoV-2 infection  $D_i$ ; recovered  $R_i$ . Respective of these variables are age-structured (i.e., vectors with age-specific component values). We have accounted for three age-classes  $a = (0 - 59, 60 - 79, 80+)$ . The compartmental model can then be written

$$\begin{aligned}
 \dot{S}_i &= -\frac{\beta S_i (\sum_a I_i + \sum_{i \neq j} \langle T_I \rangle_{ij} - \sum_{j \neq i} \langle T_I \rangle_{ji})}{N_i} & \text{S.1} \\
 \dot{E}_i &= \frac{\beta S_i (\sum_a I_i + \sum_{i \neq j} \langle T_I \rangle_{ij} - \sum_{j \neq i} \langle T_I \rangle_{ji})}{N_i} - \frac{E}{l} \\
 \dot{I}_i &= \frac{E}{l} - (\epsilon \gamma_H + (1 - \epsilon_i) \gamma) I_i \\
 \dot{H}_i &= \epsilon_i \gamma_H I_i - \left( \chi_i \gamma_C + \frac{(1 - \chi_i)}{h} \right) H_i \\
 \dot{C}_i &= \chi_i \gamma_C H_i - \left( \frac{\mu}{p} + \frac{(1 - \mu)}{p} \right) C_i \\
 \dot{\tilde{H}}_i &= \frac{(1 - \mu)}{p} C_i - \tilde{\gamma} \tilde{H}_i \\
 \dot{D}_i &= \frac{\mu}{p} C_i \\
 \dot{R}_i &= (1 - \epsilon_i) \gamma I_i + \frac{(1 - \chi_i)}{h} H_i + \tilde{\gamma} \tilde{H}_i
 \end{aligned}$$

where  $N = S_i + E_i + I_i + R_i$ , and where  $\langle T_I \rangle_{ij}$  denotes the number of infected individuals from the  $j$ th municipality visiting the  $i$ th municipality, on average for a day, and  $\langle T_I \rangle_{ji}$  denotes the number of infected individuals from the  $i$ th municipality going the  $i$ th municipality, on average for a day. These mobility rates are given by the Radiation model<sup>1</sup>, where we used the time dependent rate scaling  $\alpha(t)$ , with 0.001 as the baseline, i.e., the counter-scenario of inter-municipality travel-reductions. Please see table S1 for model parameterization that was based to a large extent on Ferguson et al.<sup>2</sup>

| <b>Table 1.</b> Parameters in equation system S.1 and their respective values. |                                                                                                        |                                                                                                     |
|--------------------------------------------------------------------------------|--------------------------------------------------------------------------------------------------------|-----------------------------------------------------------------------------------------------------|
| <b>Parameter</b>                                                               | <b>Notation and value</b>                                                                              | <b>Notes</b>                                                                                        |
| Age-classes                                                                    | $a = (0 - 59, 60 - 79, 80 +)$                                                                          |                                                                                                     |
| Time-dependent transmission rate                                               | $\beta = 0.55c(t)$                                                                                     |                                                                                                     |
| Latent period                                                                  | $l = 4$                                                                                                |                                                                                                     |
| Recovery rate or removal rate                                                  | $\gamma = 1/5$                                                                                         |                                                                                                     |
| The proportion of infected cases requiring hospitalization                     | $\epsilon_i$                                                                                           | See table 2 for age structured values                                                               |
| Hospitalization rate of infected cases requiring hospitalization               | $\gamma_H = 1/5$                                                                                       |                                                                                                     |
| The proportion of hospitalized cases requiring critical care                   | $\chi_i$                                                                                               | See table 2 for age structured values                                                               |
| Rate of going into critical care                                               | $\gamma_C = 1/6$                                                                                       |                                                                                                     |
| Critical-care period                                                           | $p = 7$                                                                                                |                                                                                                     |
| The proportion in critical care that dies                                      | $\mu = 0.49$                                                                                           |                                                                                                     |
| Recovery rate from health care after critical care                             | $\tilde{\gamma} = 1/7$                                                                                 |                                                                                                     |
| Time-dependent contact rate                                                    | $c(t) = \frac{1 - \hat{c}}{1 + \exp(5(t - \hat{t}))} + \hat{c}$                                        | Contact rate reduced to $\hat{c}$ around $\hat{t} =$ March 20                                       |
| Time-dependent inter-municipality travel-rate scaling                          | $\alpha(t) = \alpha_0 \left( \frac{1 - \hat{\alpha}}{1 + \exp(5(t - \hat{t}))} + \hat{\alpha} \right)$ | Travel rate reduced to $\alpha_0 \hat{\alpha}$ around $\hat{t} =$ March 20; with $\alpha_0 = 0.001$ |
| Contact rate scaling (reduction)                                               | $\hat{c} = (1, 0.75, 0.5, 0.25)$                                                                       | Four scenarios, where the first means no change to normal.                                          |
| Travel rate scaling (reduction)                                                | $\hat{\alpha} = (1, 0.5)$                                                                              | Two scenarios, where the first means no change to normal.                                           |

Table 2 Severity of age-classes (from Ferguson et al. 2020). Drawing on these age-structured data, we derived the corresponding *proportion of infected cases requiring hospitalization* for age-classes  $a = (0 - 59, 60 - 79, 80+)$  by first correcting for underreporting (50%, 80%, 80%), and by taking a weighted average for each age-class in  $a$ . We also derived the *proportion of hospitalized cases requiring critical care* by the weighted averaging, and not correcting for underreporting as there is naturally no underreporting of hospitalized cases.

| <b>Age-class (years)</b> | <b>Percent of reported cases requiring hospitalization</b> | <b>Percent of hospitalized cases requiring critical care</b> |
|--------------------------|------------------------------------------------------------|--------------------------------------------------------------|
| 0-9                      | 0.1                                                        | 5.0                                                          |
| 10-19                    | 0.3                                                        | 5.0                                                          |
| 20-29                    | 1.2                                                        | 5.0                                                          |
| 30-39                    | 3.2                                                        | 5.0                                                          |
| 40-49                    | 4.9                                                        | 6.3                                                          |
| 50-59                    | 10.2                                                       | 12.2                                                         |
| 60-69                    | 16.6                                                       | 27.4                                                         |
| 70-79                    | 24.3                                                       | 43.2                                                         |
| 80+                      | 27.3                                                       | 70.9                                                         |

## References

1. Simini, F., González, M.C., Maritan, A. & Barabási, A.-L. (2012). A universal model for mobility and migration patterns. *Nature*, 484, 96–100.
2. N Ferguson, et al. Impact of non-pharmaceutical interventions (npis) to reduce covid-19 mortality and healthcare demand. DOI: <https://doi.org/10.25561/77482> 2020.

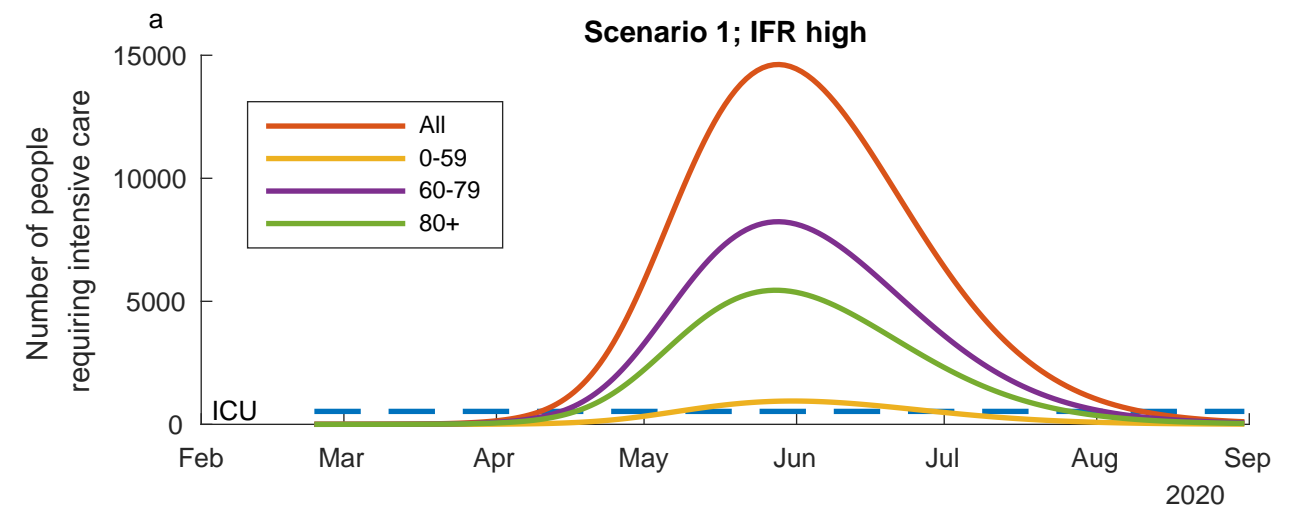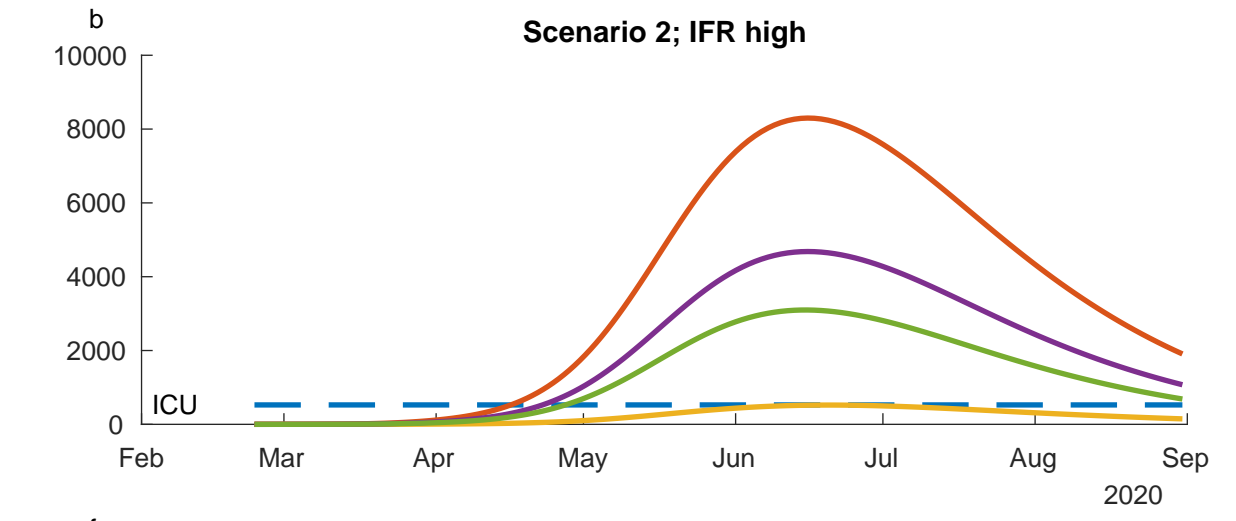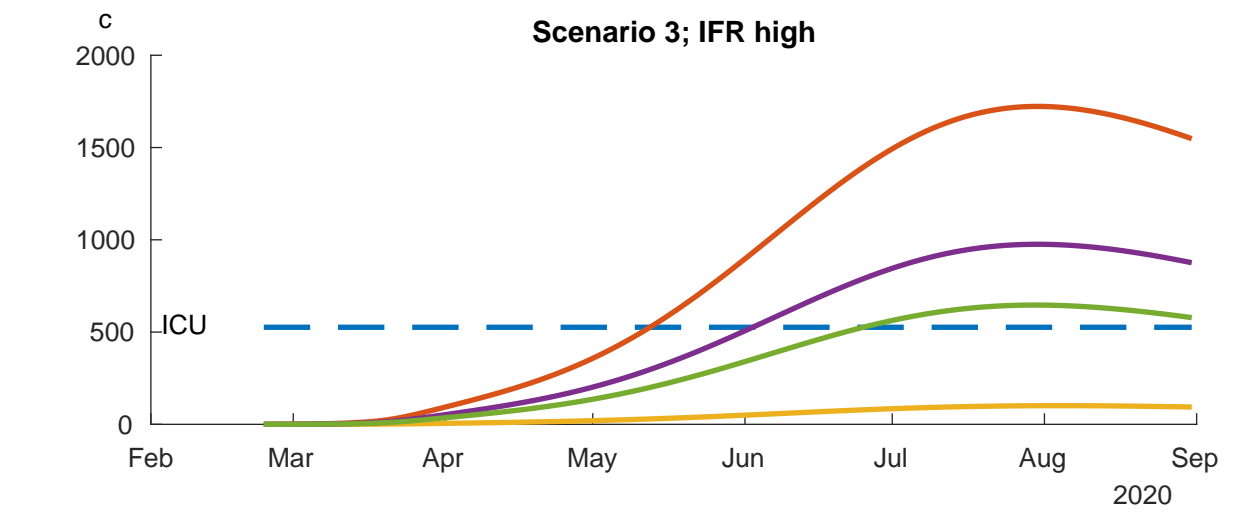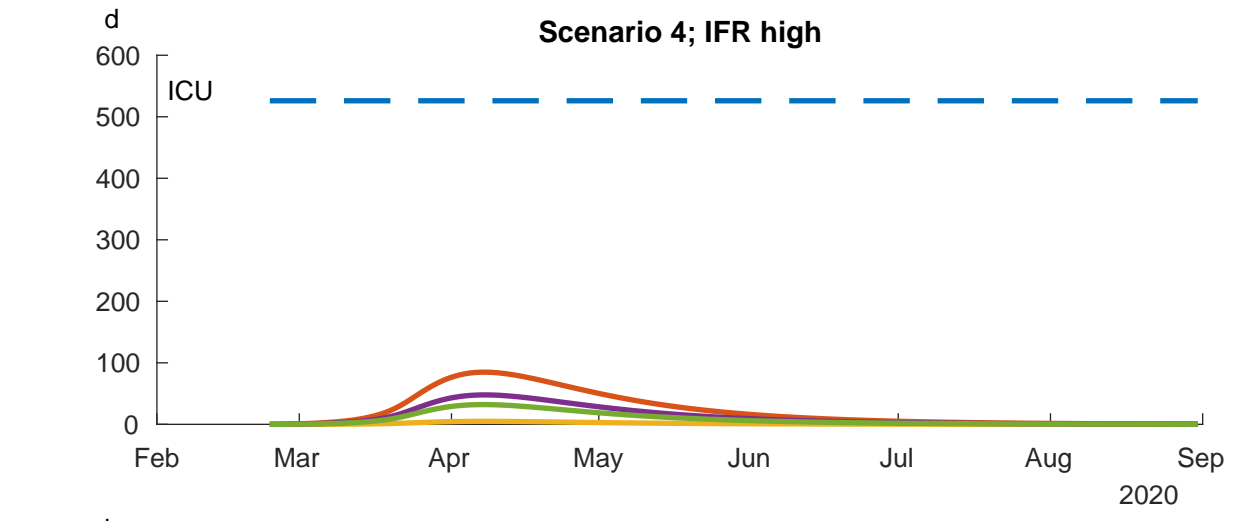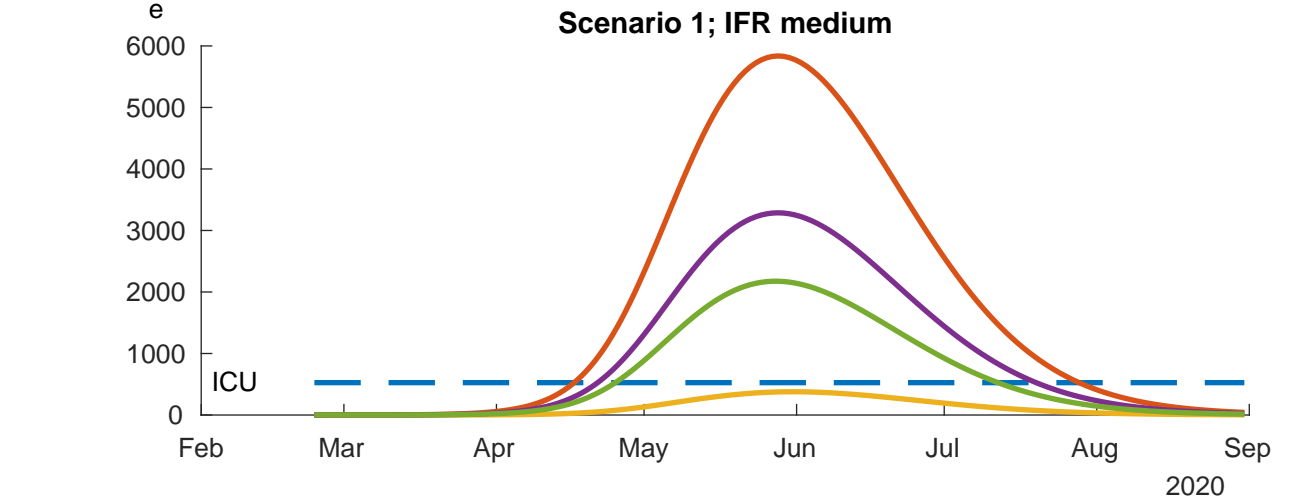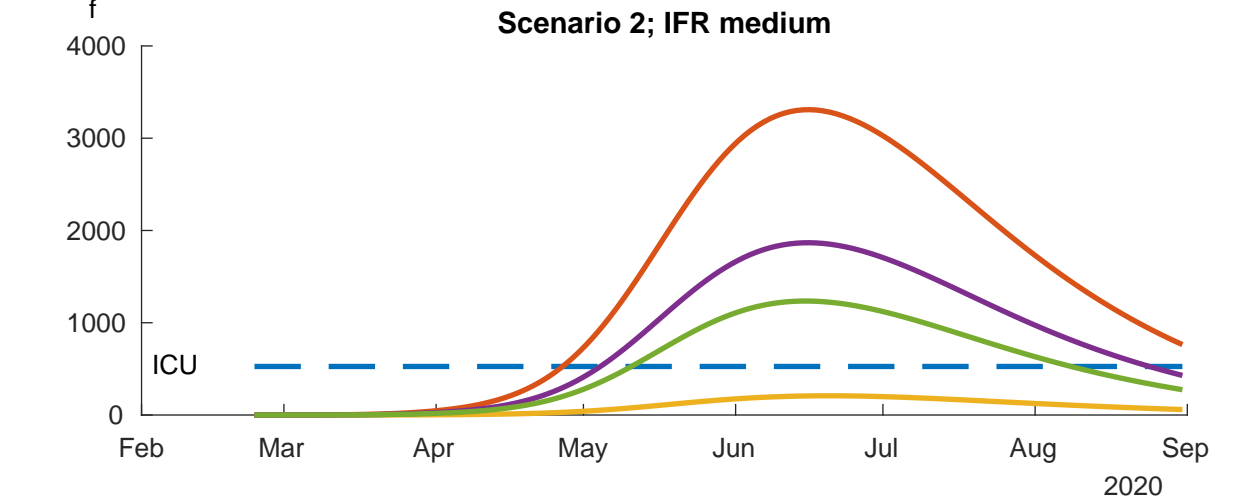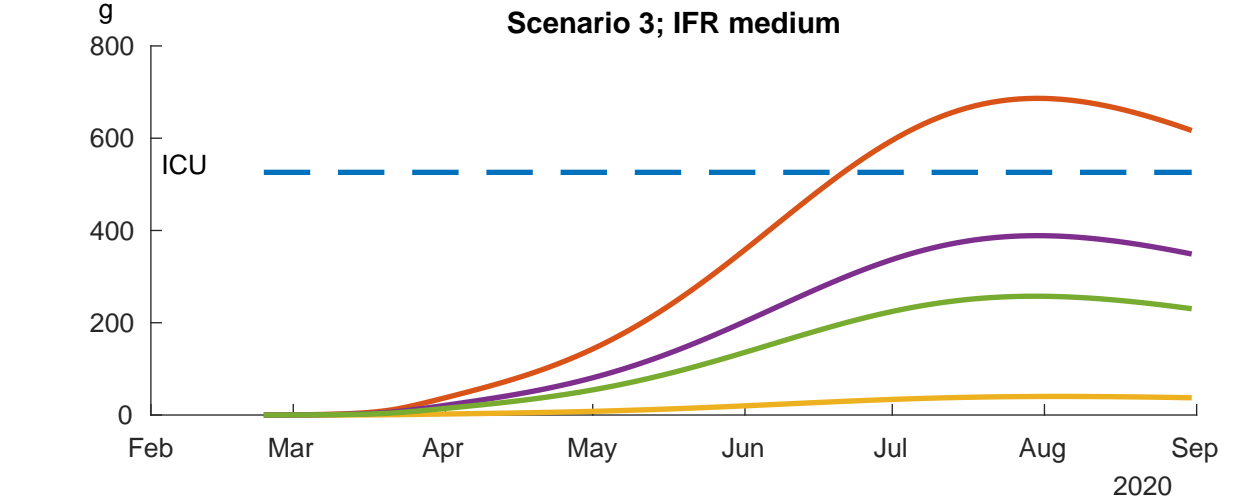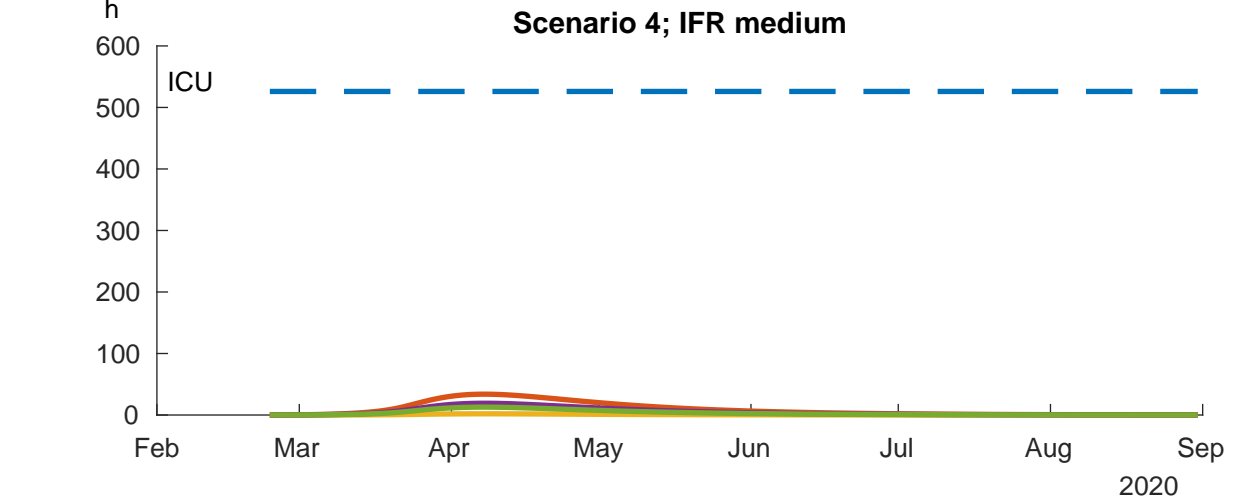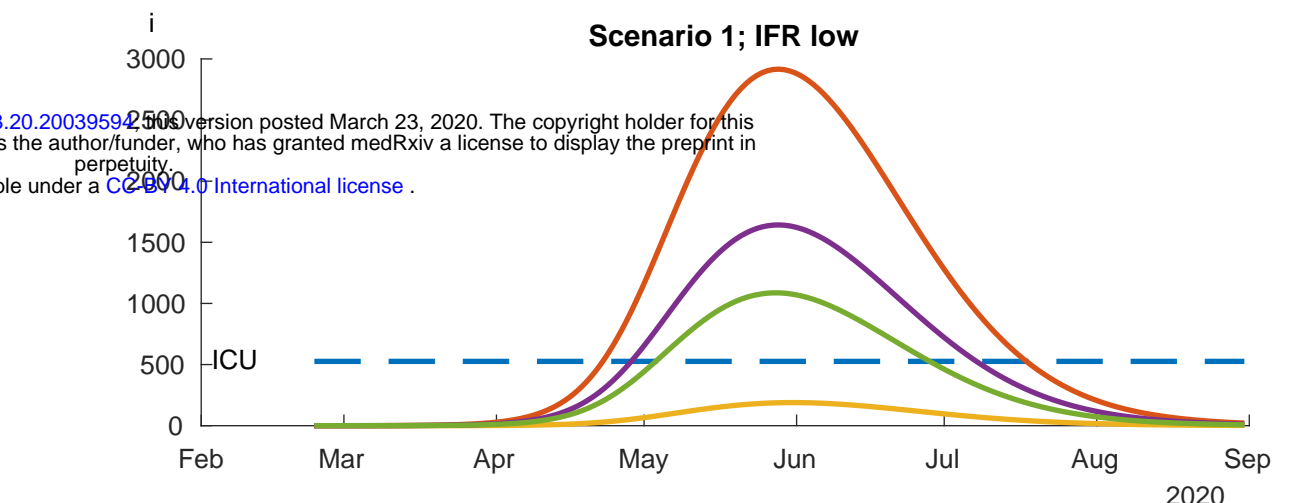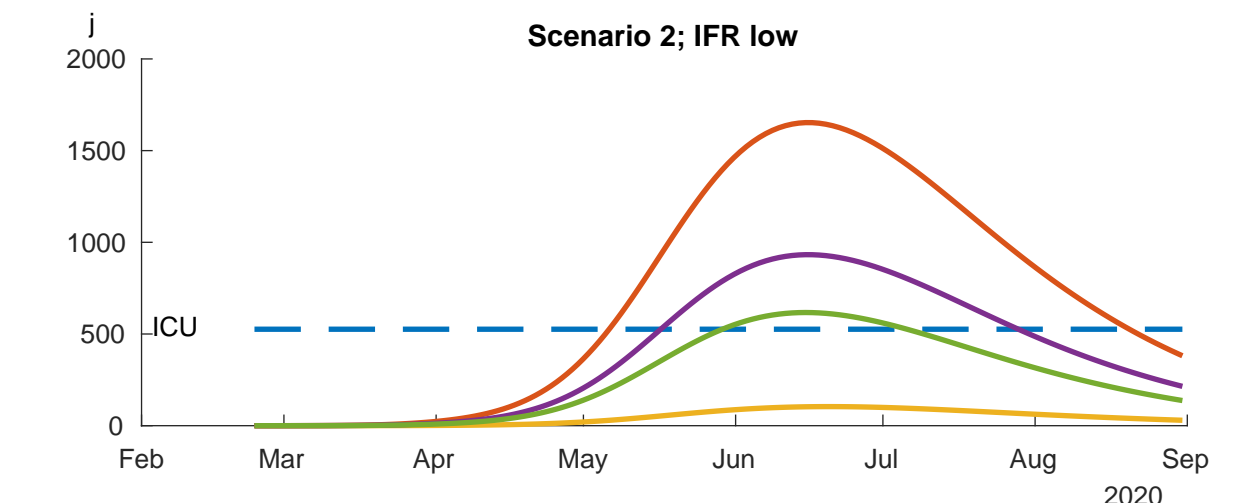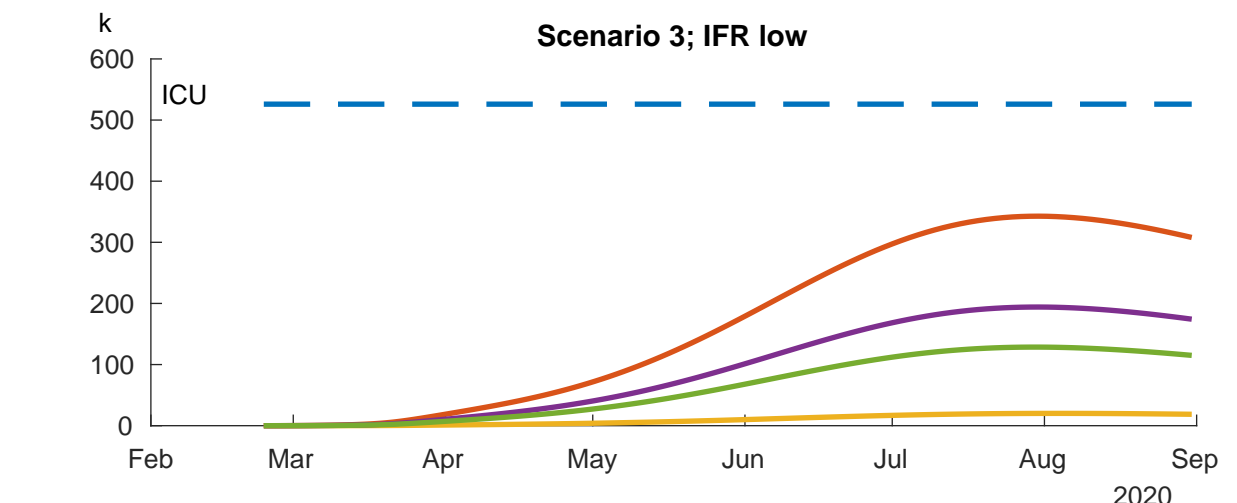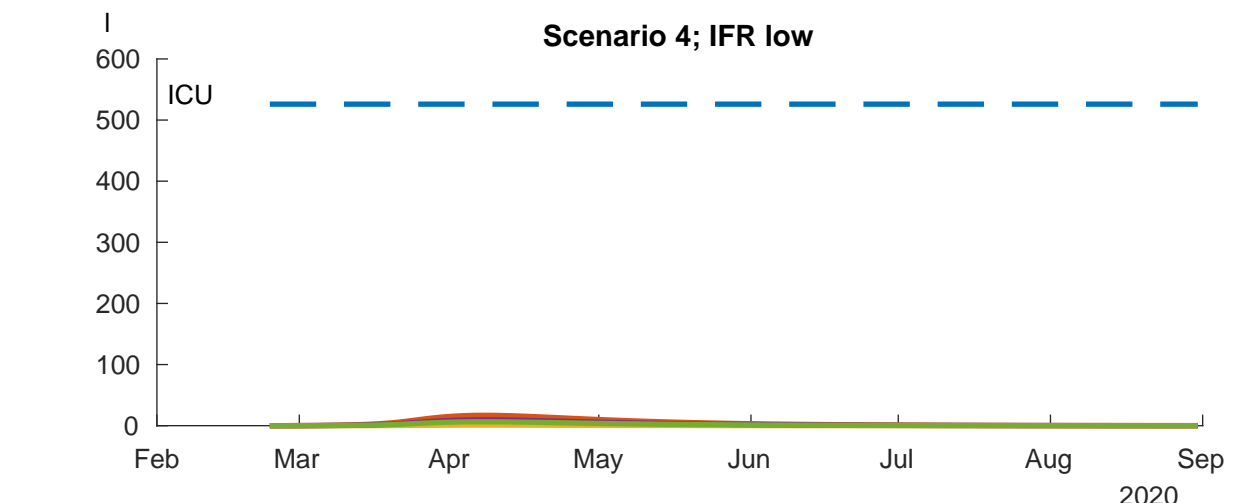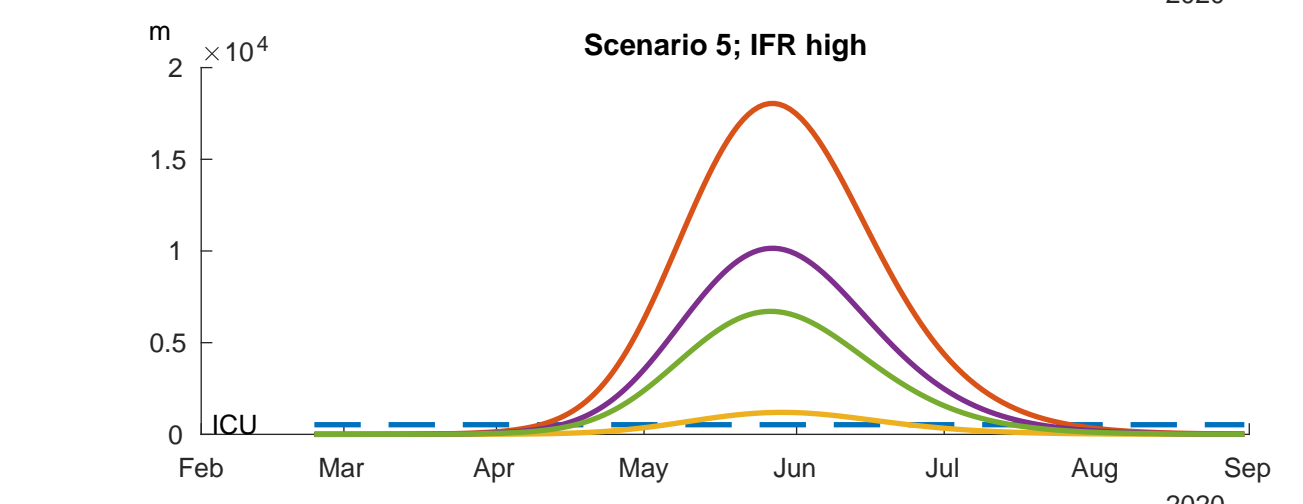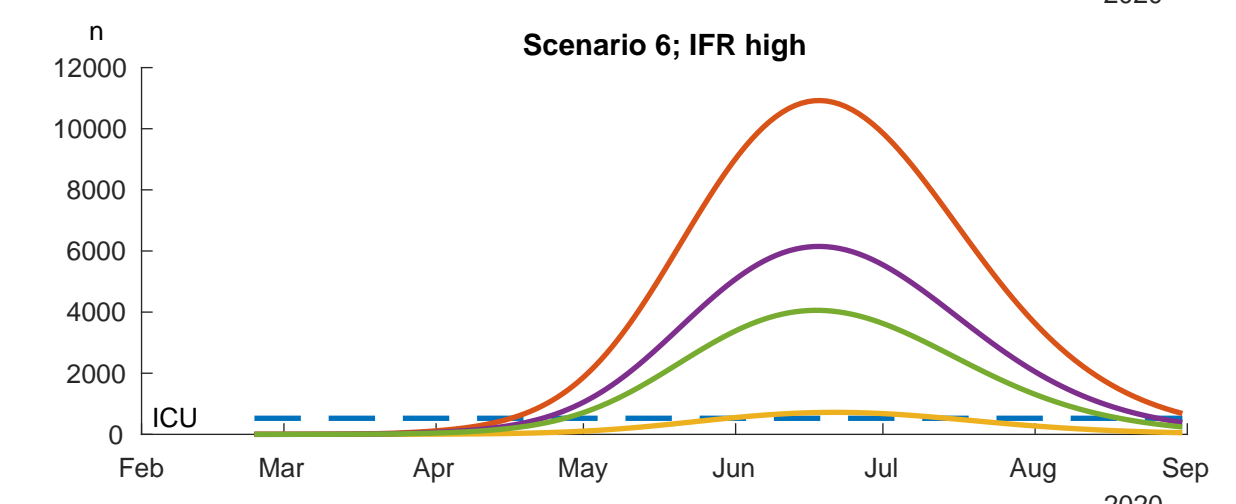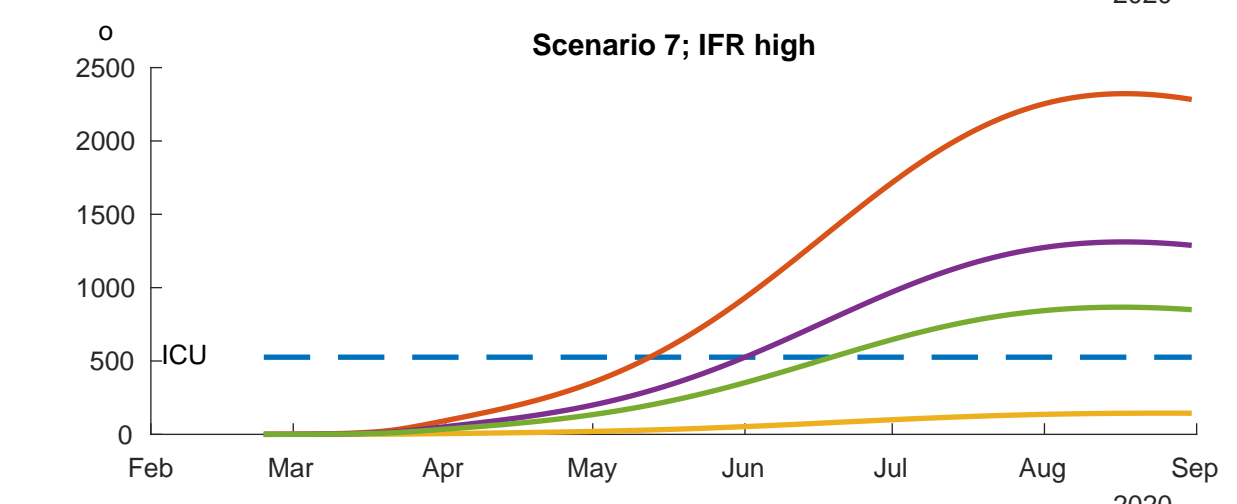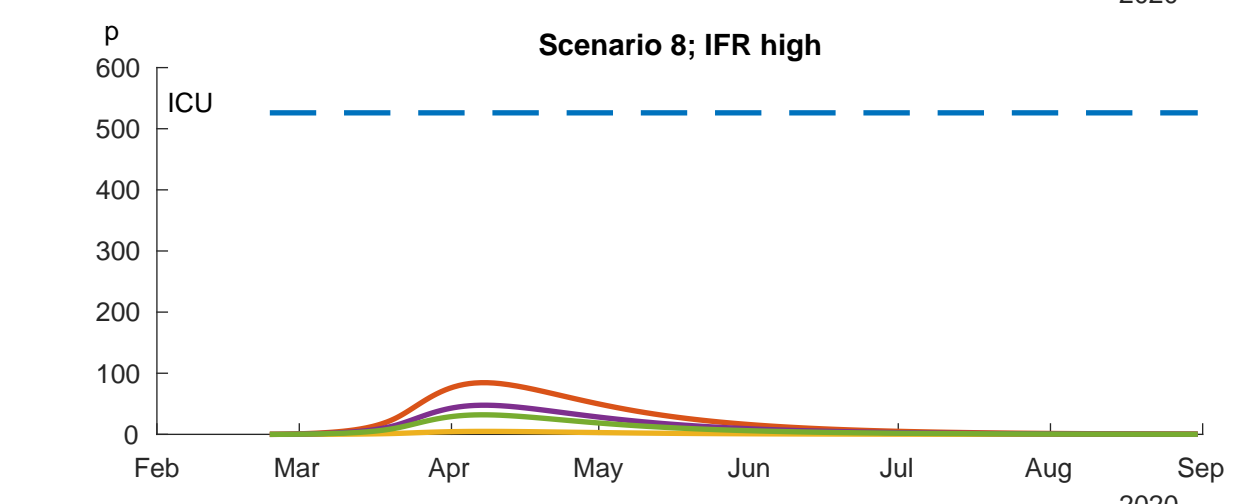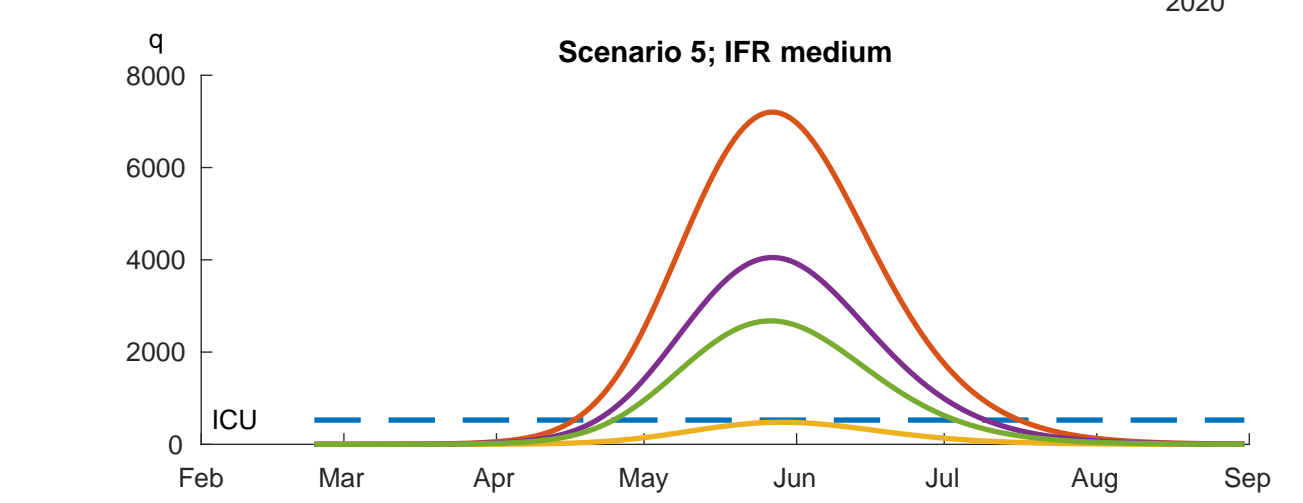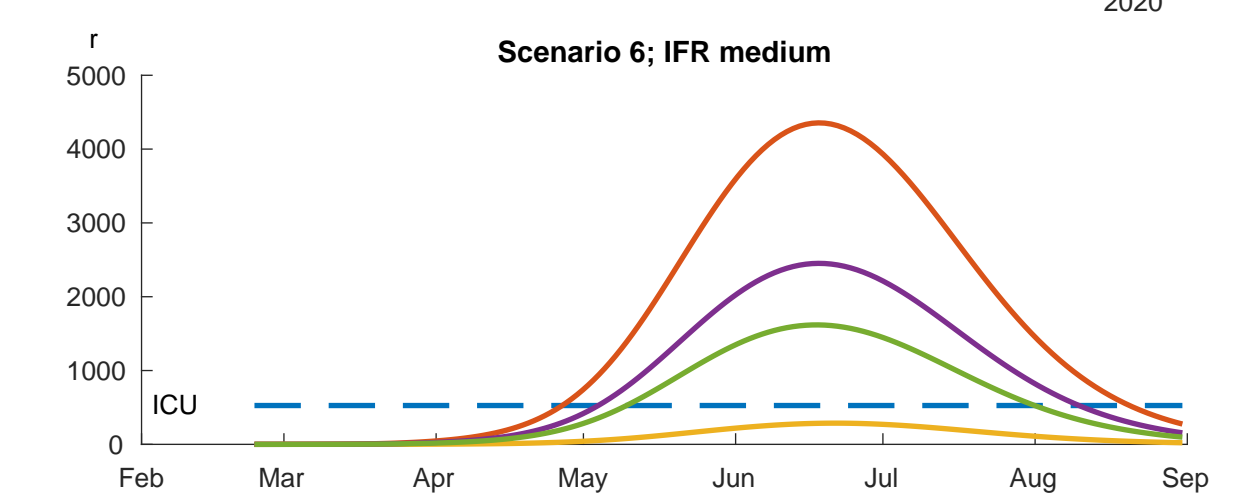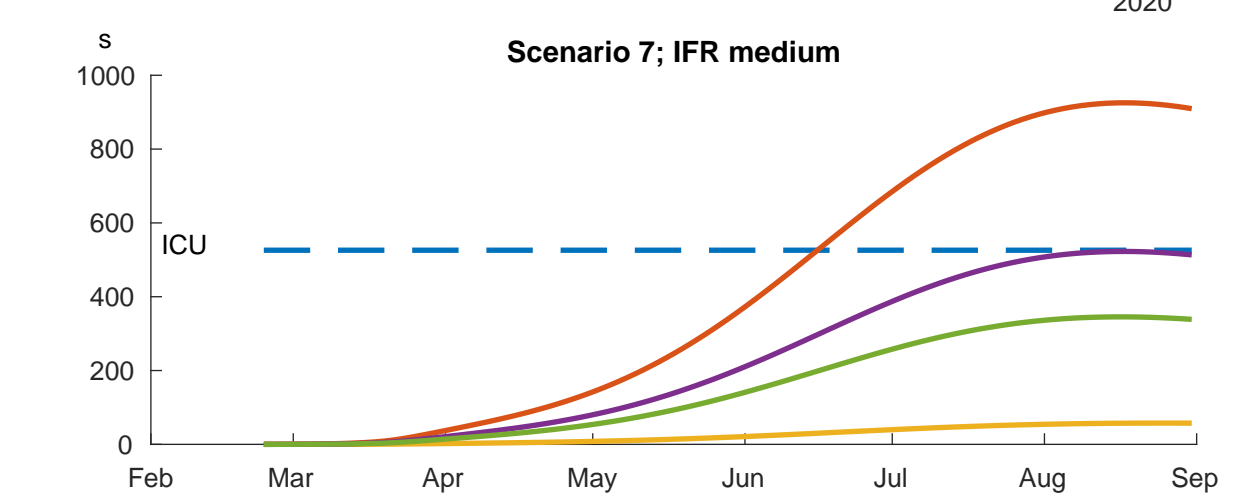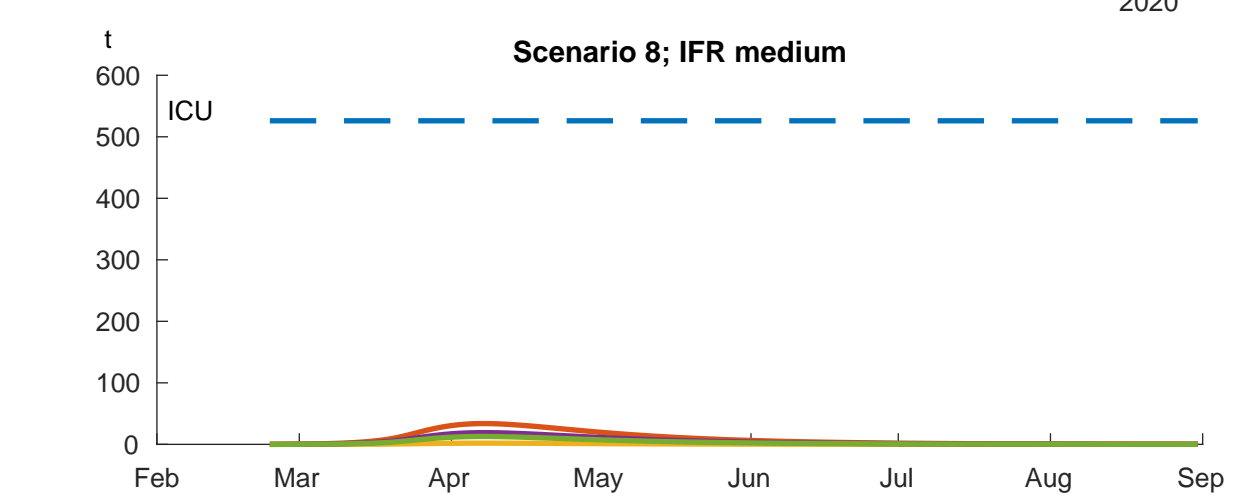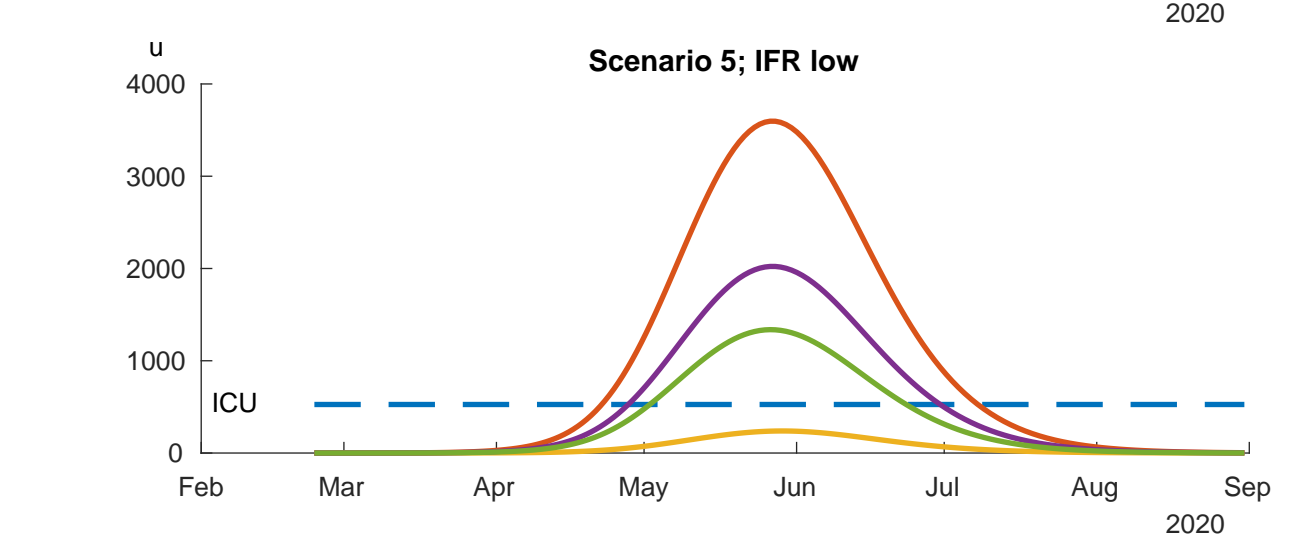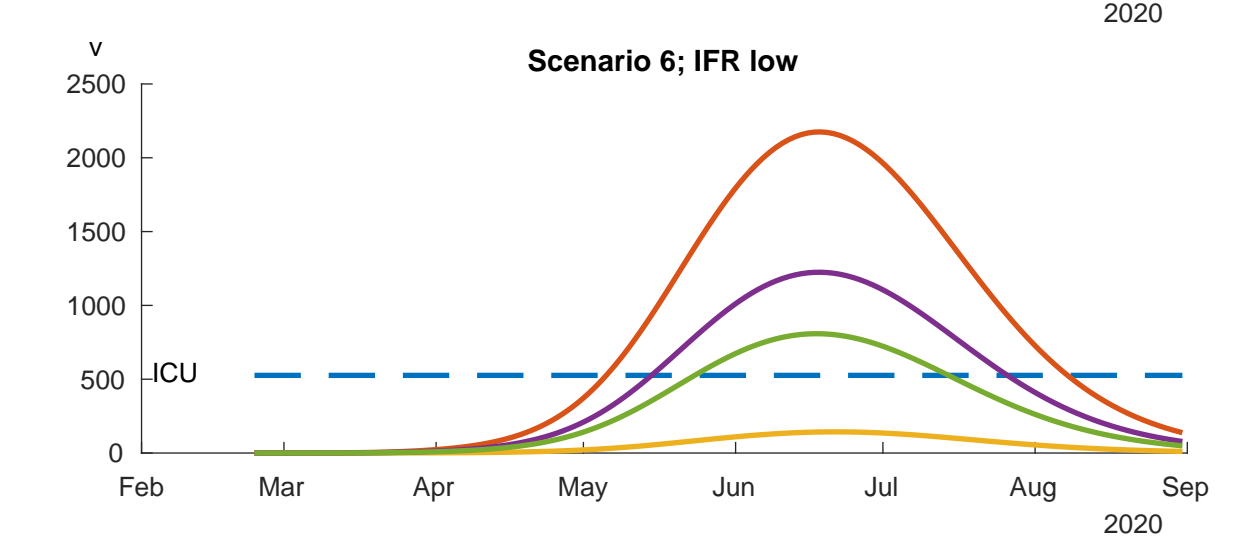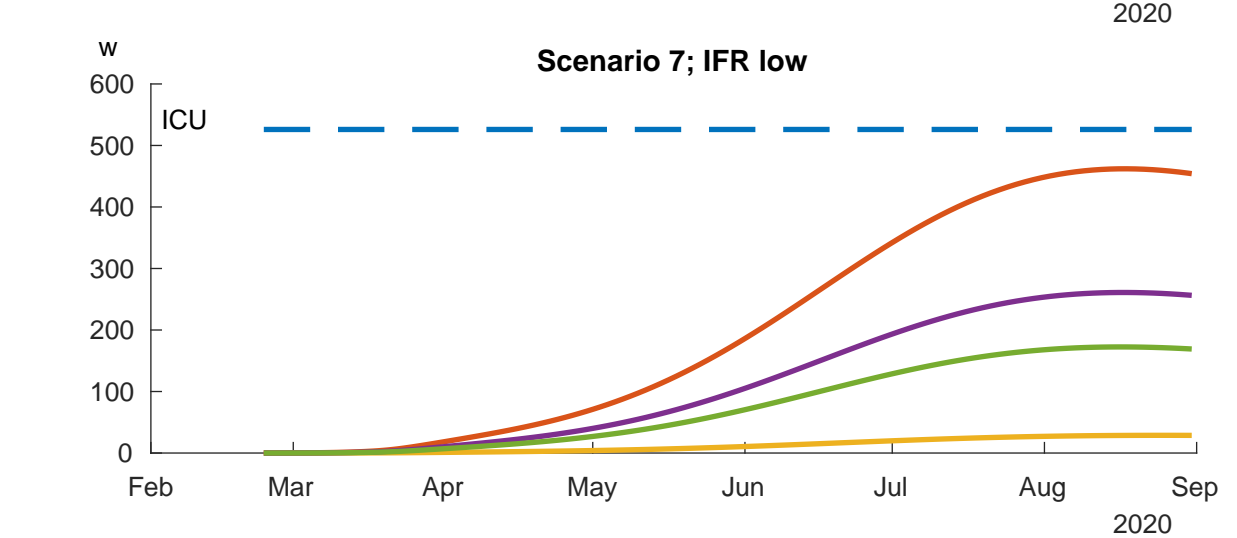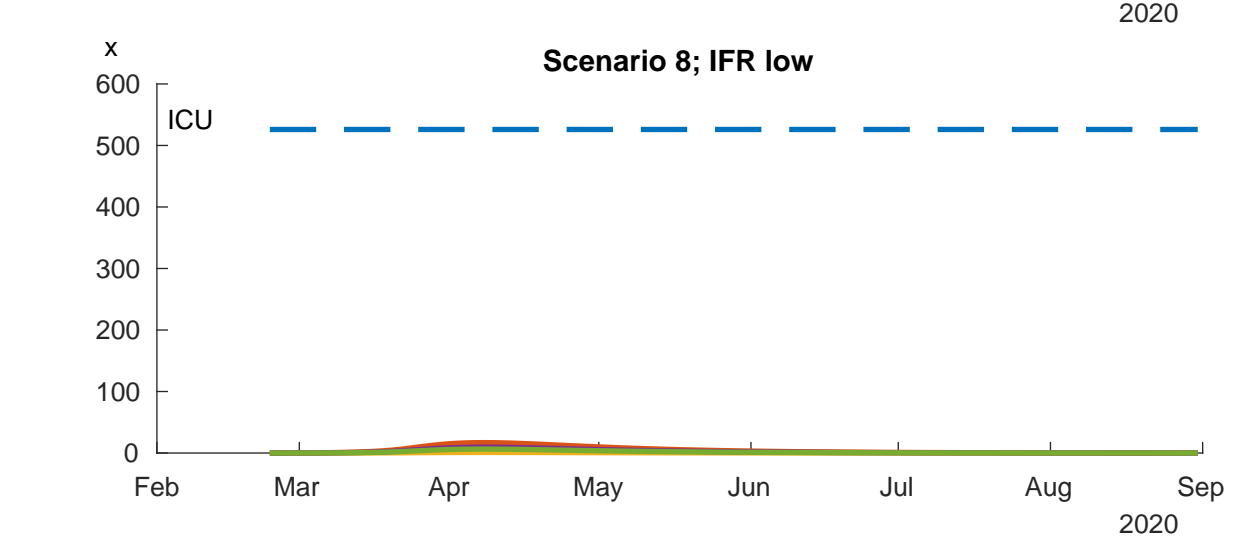

medRxiv preprint doi: <https://doi.org/10.1101/2020.03.20.20039599>; this version posted March 23, 2020. The copyright holder for this preprint (which was not certified by peer review) is the author/funder, who has granted medRxiv a license to display the preprint in perpetuity. It is made available under a CC-BY 4.0 International license.

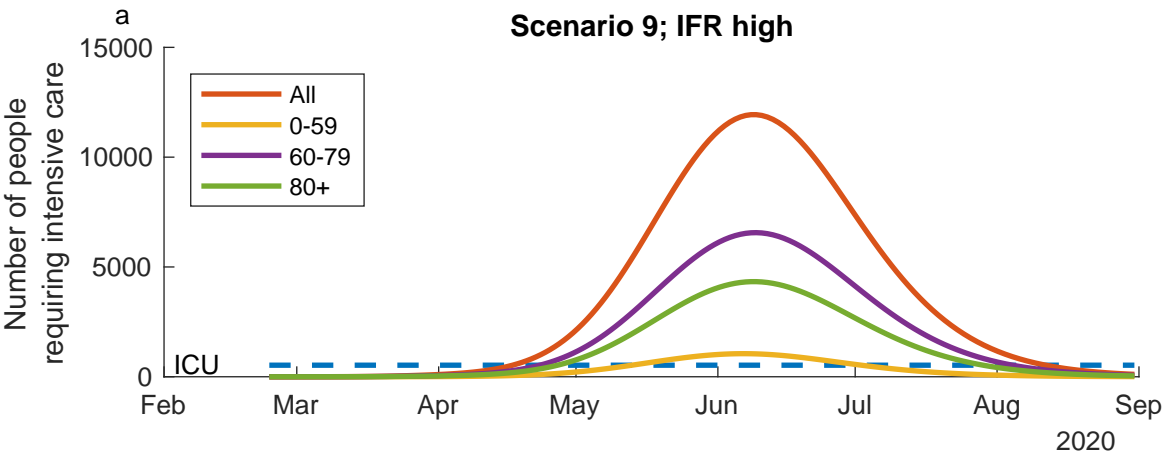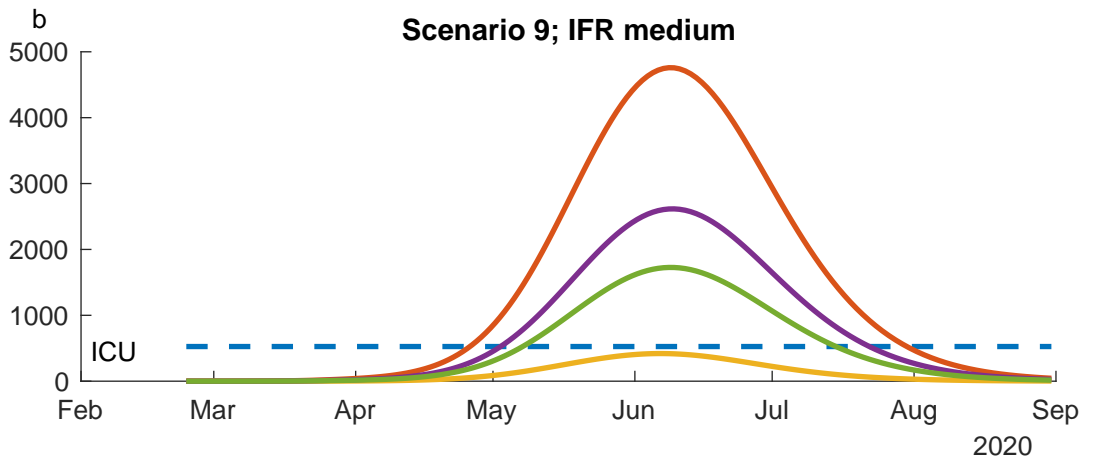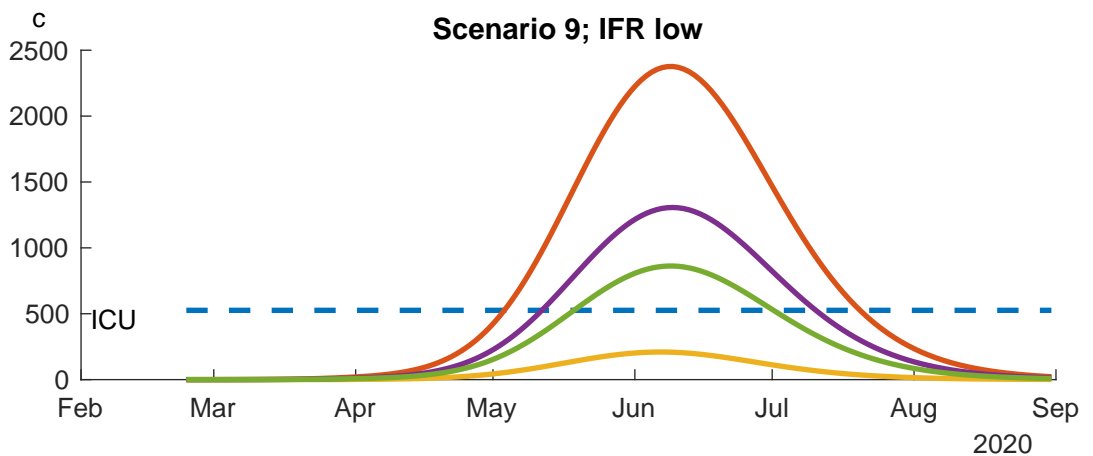

Source: https://medrxiv.org/content/medrxiv/early/2020/03/23/2020.03.20.20039594.full.pdf
